# Supplementary material for: Fast swelling strategy for flower-like micro-sized colloidal surfactants with controllable patches by regulating the Tg of seed particles
Source: Royal Society of Chemistry journal article supplement (doi:10.1039/c7py00966f), 2017-01-01
Supplement: c7py00966f1.pdf [file c7py00966f1.pdf]

## Supporting Information

# Fast Swelling Strategy for Flower-Like Micro-Sized Colloidal Surfactants with Controllable Patches by Regulating the T<sub>g</sub> of Seed Particles

*Lei Tian,<sup>1,2</sup> Xue Li,<sup>1,2</sup> Jin Liu,<sup>1,2</sup> Dewei Wan,<sup>1,2</sup> Zafar Ali<sup>1,2</sup> and Qiuyu Zhang<sup>1,2\*</sup>*

<sup>1</sup> Department of Applied Chemistry, School of Natural and Applied Sciences,  
Northwestern Polytechnical University, Xi'an 710072, China

<sup>2</sup> The Key Laboratory of Space Applied Physics and Chemistry, Ministry of  
Education, Northwestern Polytechnical University, Xi'an 710072, China

\*Corresponding author:

E-mail: [qyzhang@nwpu.edu.cn](mailto:qyzhang@nwpu.edu.cn).

Tel: +86-029-88431675; Fax: +86-029-88431653.

Youyi Road 127#, Xi'an (710072), China;

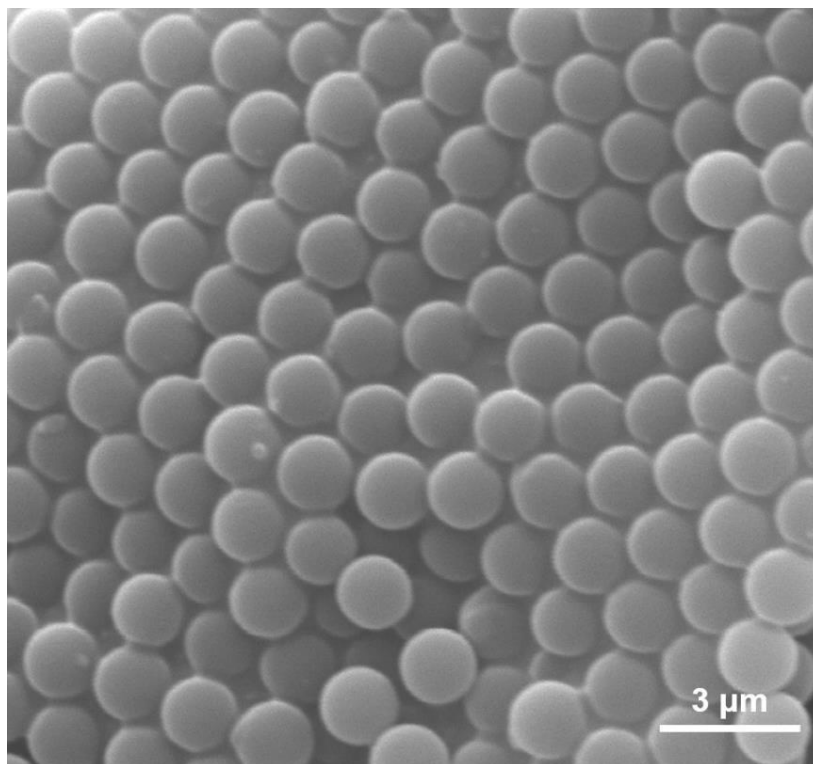

**Figure S1.** SEM image of P(GMA-*co*-*n*BA)<sub>5%</sub> seed particles.

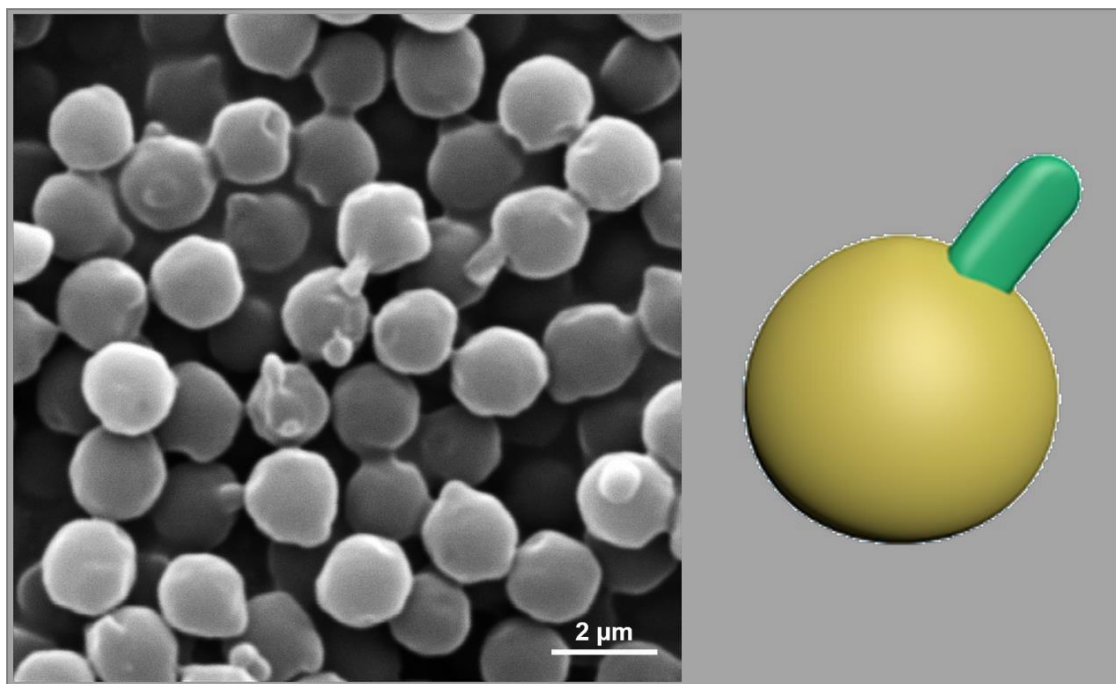

**Figure S2.** SEM image of P(GMA-*co*-nBA)<sub>20%</sub> seed particles with a horn structure.

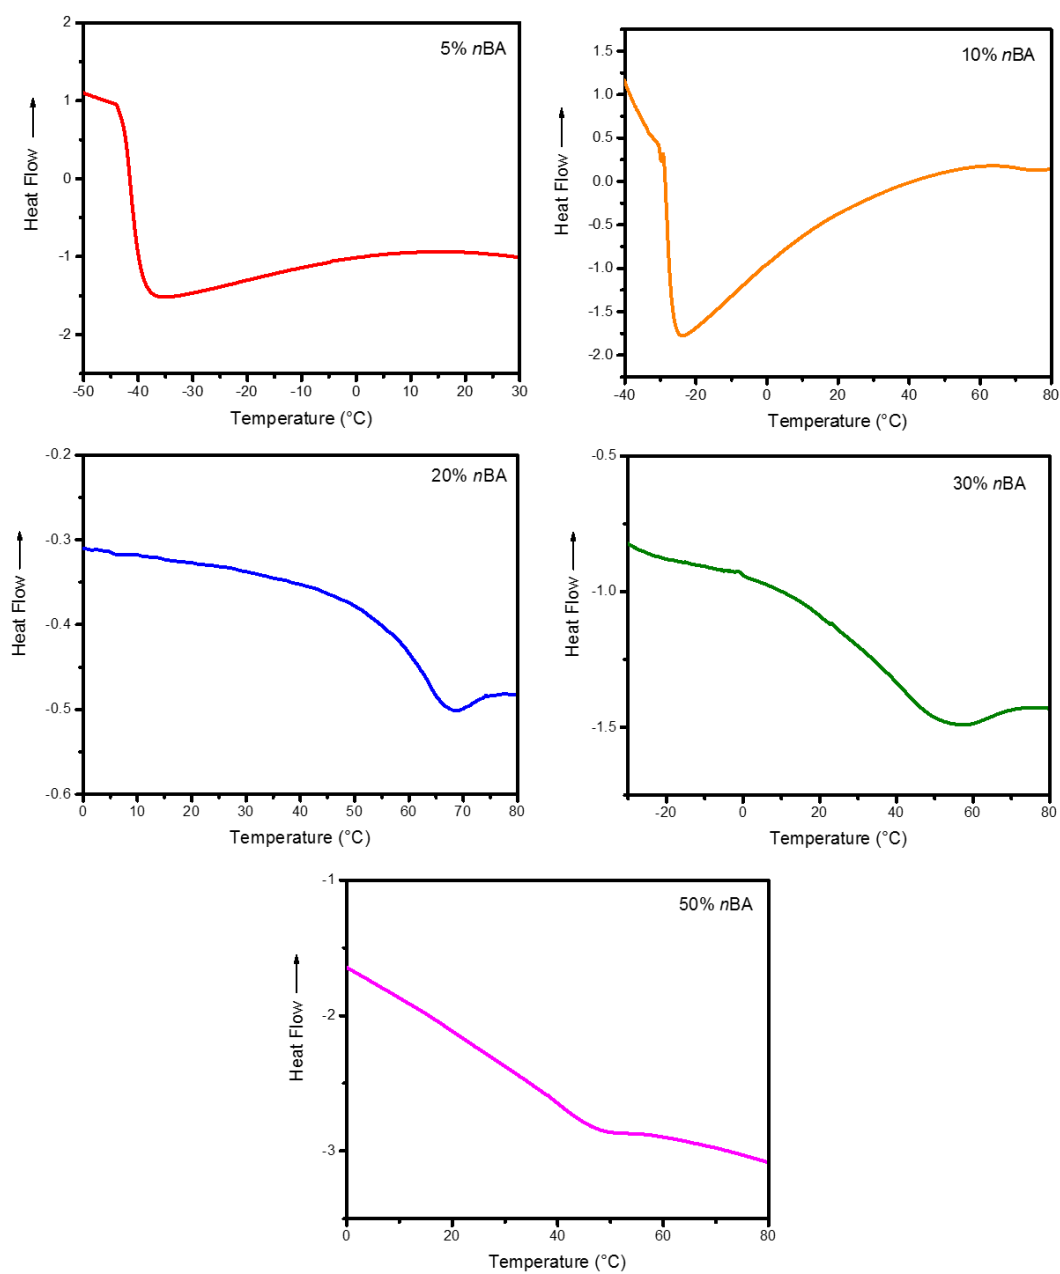

**Figure S3.** DSC traces of P(GMA-co-*n*BA) seed particles with different amount of *n*BA (5, 10, 20, 30, 50wt%).

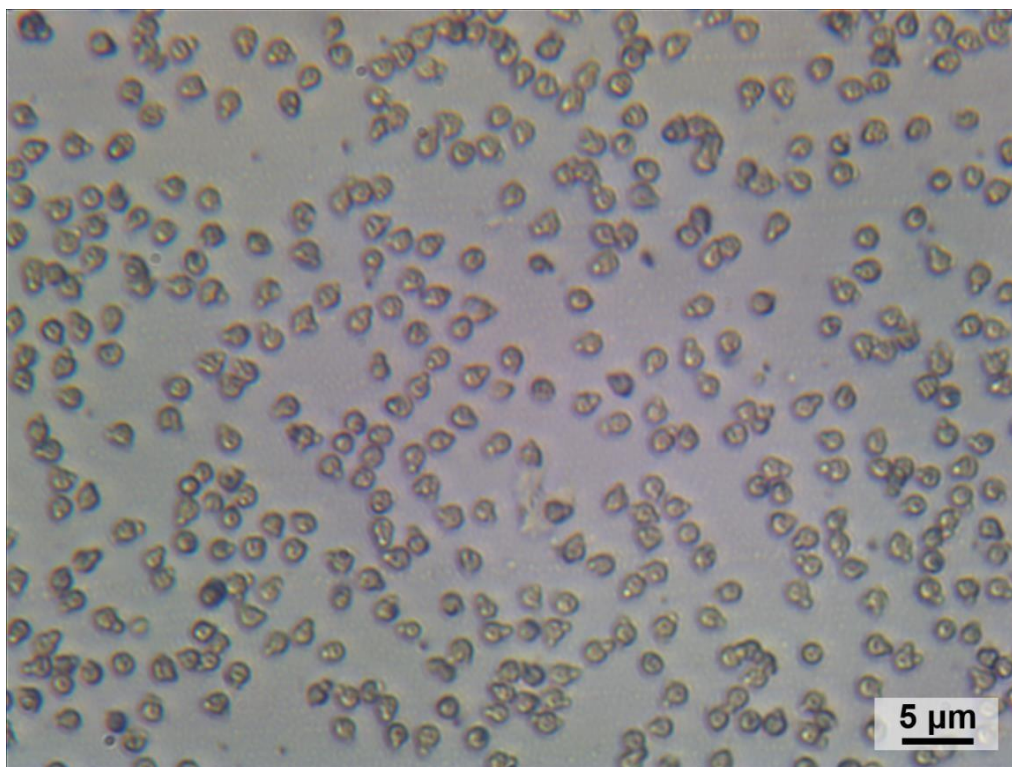

**Figure S4.** OM image of badminton-shaped Janus MSSs using P(GMA-*co*-nBA)<sub>20%</sub> as seed particles.

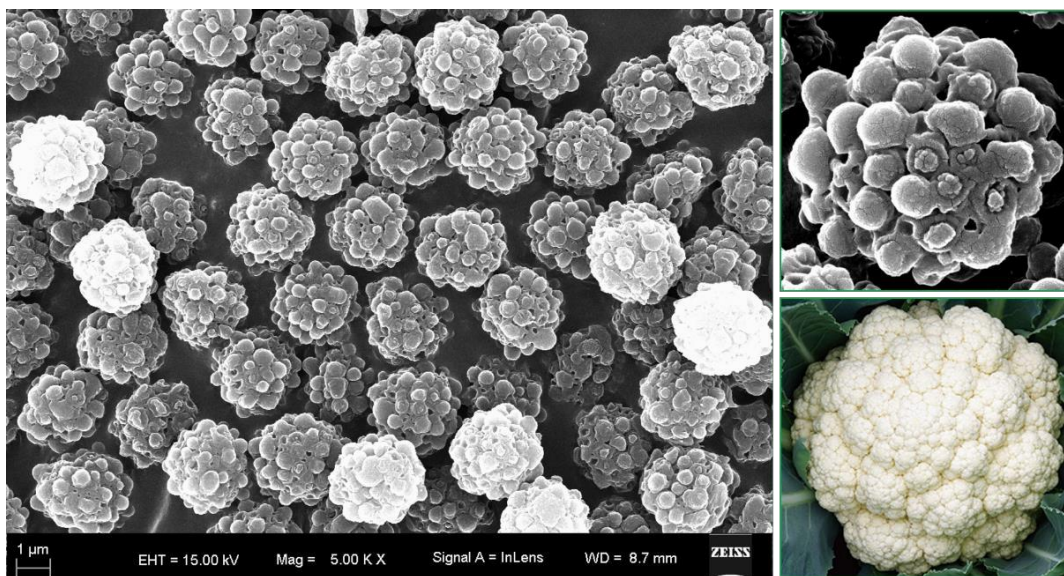

**Figure S5.** SEM images of flower-like patchy microparticles prepared by  $P(\text{GMA-co-nBA})_{10\%}$ .

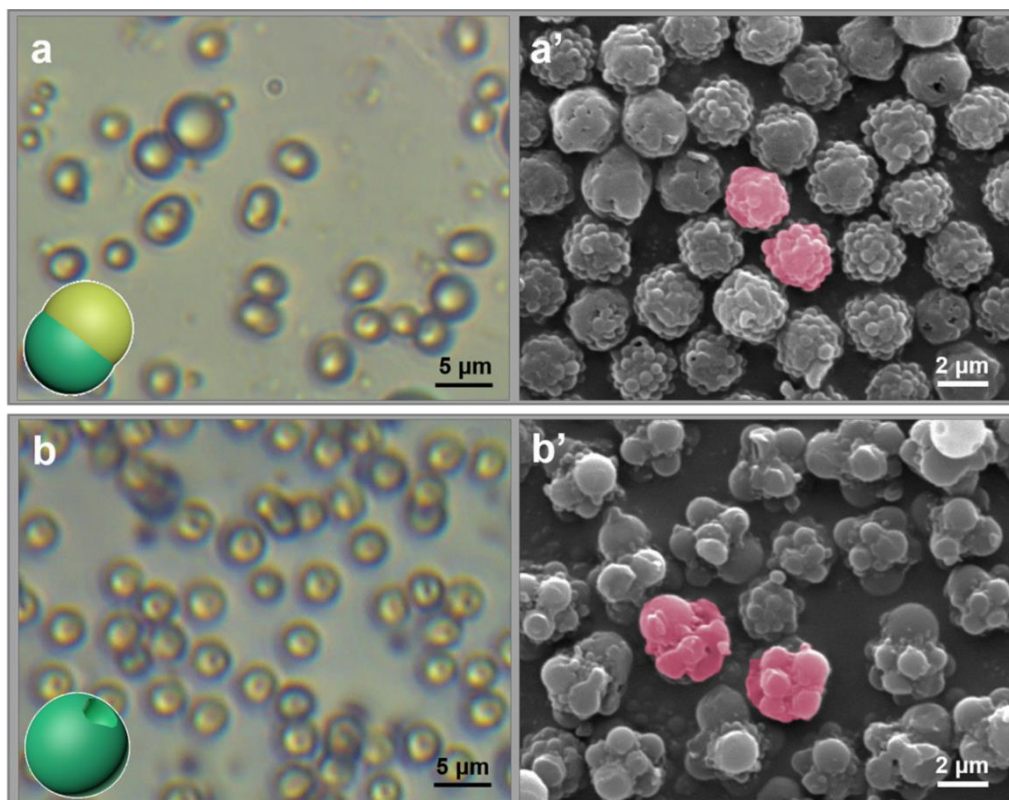

**Figure S6.** (a, a') OM and SEM images of swollen seed particles by toluene, and prepared patchy microparticles. (b, b') OM and SEM images of swollen seed particles by hexadecane, and prepared patchy microparticles.

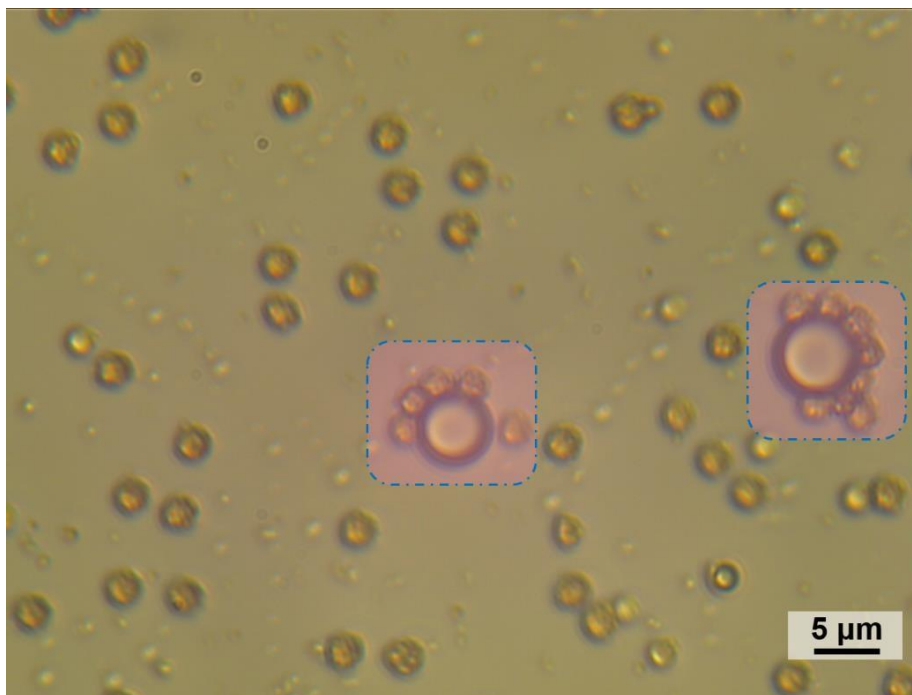

**Figure S7.** OM image of flower-like patchy microparticles prepared with Ss: 2.5, Sp:

1.0.



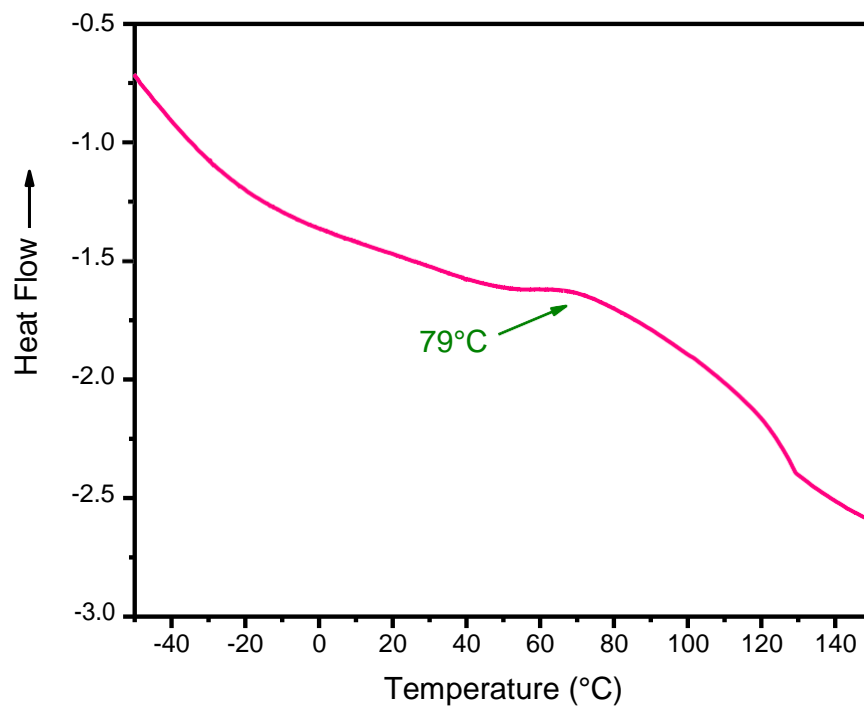

**Figure S8.** DSC curve of as-prepared flower-like patchy microparticles.

### Formation mechanism of the horns on the seed P(GMA-co-*n*BA) particles:

The horn on the P(GMA-co-*n*BA) seed particles is a new phenomenon we have not described in other places. In the dispersion polymerization of GMA and *n*BA, the polymerization rates of monomers are different. Therefore, the phase separation of *Pn*BA and P(GMA-co-*n*BA) will occur to form the horn on seed particles.

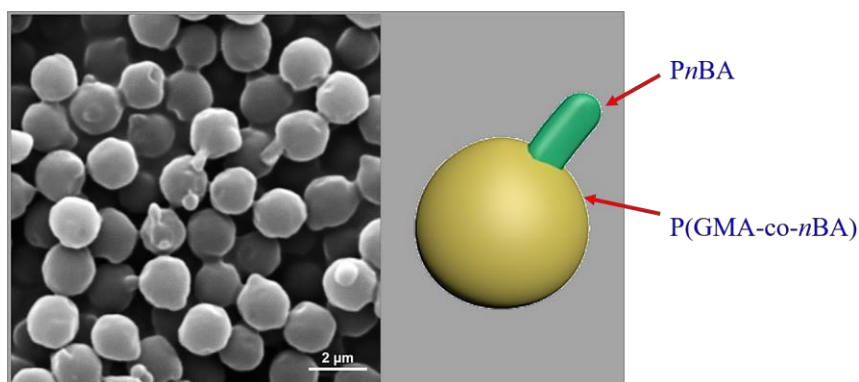

### The mechanism for the transition from the horn to holes/dimples:

We synthesized *Pn*BA particles by dispersion polymerization. Then the particles are dissolved in DBP (swelling agent) and St (swelling monomer) which were appeared in our swelling system. From the picture, *Pn*BA can be dissolved in St. So the hole was formed once P(GMA-co-*n*BA) seed particles were added into the swelling system (Figure 3). With the swelling of monomer, the holes increased constantly.
